# Supplementary material for: Das dynamische Modell der Angehörigenpflege und -betreuung
Source: Springer Nature journal article supplement (doi:10.1007/s00391-019-01574-8), 2019-07-05
Supplement: MOESM1 [file 16900454]

Anhang A: Beschreibung der Stichprobe

Die Erhebungen wurden mit N= 18 pflegenden und betreuenden Angehörigen durchgeführt.

| **Geschlecht** |  |
| --- | --- |
| m | 9 |
| f | 9 |
| **Altersverteilung**  [Alter in Jahren] |  |
| 31-40 | 1 |
| 41-50 | 3 |
| 51-60 | 5 |
| 61-70 | 3 |
| 71-80 | 3 |
| 81-90 | 3 |
| **Dauer Pflege und/ oder Betreuung in Jahren (bei Beginn**  **der Erhebung)** |  |
| < 1 Jahr | 4 |
| 1-5 Jahre | 7 |
| > 5 Jahre | 7 |
| **Wohnsituation** (pflegende und betreuende angehörige Person bzw. gepflegte/betreute  Person) |  |
| in gleichem Haushalt | 8 |
| in separatem  Haushalt | 10 |
| **Zeitliche Entwicklung des Krankheitsverlaufs** (bzw. des Pflege- und/oder Betreuungsbedarfs) der gepflegten/betreuten  Person |  |
| schubweise | 5 |
| schleichend | 11 |
| akut | 2 |
