# Supplementary material for: Das dynamische Modell der Angehörigenpflege und -betreuung
Source: Springer Nature journal article supplement (doi:10.1007/s00391-019-01574-8), 2019-07-05
Supplement: MOESM2 [file 16900454]

**Anhang B: Definition der Strukturelemente von Causal Loop Diagrams**

Ein kausales Diagramm (Causal Loop Diagramm) besteht aus Variablen, die mit polaren Kausalbeziehungen verbunden sind. Eine Kausalbeziehung A  B mit der Polarität (+) bedeutet „mehr A führt zu mehr B” bzw.

„weniger A führt zu weniger B”.

Eine Kausalbeziehung mit der Polarität (-) signalisiert: „Mehr A führt zu weniger B” bzw. „weniger A führt zu mehr B”. Ein gerichteter Kreis von Kausalbeziehungen stellt eine Rückkoppelung dar.

Die Polarität einer Rückkoppelung ergibt sich durch Multiplikation der Polaritäten aller Kausalbeziehungen im gerichteten Kreis. Ri (R1, R2) bezeichnet Rückkoppelungen mit positiver Polarität. Diese sind selbstverstärkend (R = Reinforcing). Selbstverstärkung bedeutet, dass eine externe Einwirkung eine Rückwirkung herbeiführt, welche die gleiche Richtung wie die ursprüngliche Wirkung beibehält. Bi stellt Rückkoppelungen
