# Supplementary material for: Das dynamische Modell der Angehörigenpflege und -betreuung
Source: Springer Nature journal article supplement (doi:10.1007/s00391-019-01574-8), 2019-07-05
Supplement: MOESM4 [file 16900454]

{UTF-8}
subjektiv wahrgenommene Überlastung=
	MAX((subjektiv wahrgenommene Belastung-1)*Referenzwert zeitliche Beanspruchung,0)
	~	h/Woche
	~	Die Verpflichtungen, die eine PBAP subjektiv als z. Z. zuviel wahrnimmt; \
		gemessen in h/Woche gemäss Bedarfsdefinition z.B. in der Variable P&B \
		Leistung.
	|

zeitliche Beanspruchung=
	MIN(XIDZ( zeitliche Beanspruchung unter Referenzwert Leistungsfähigkeit, Leistungsfähigkeit\
		 , Maximalwert Belastung),Maximalwert Belastung
	)
	~	h/Woche
	~	Die Anzahl Stunden pro Woche, die die PBAP durch die Pflege- und \
		Betreuungstätigkeit oder durch andere Verpflichtungen beansprucht ist, um \
		alle ihre Verpflichtungen so zu bewältigen, dass sie es für angemessen \
		hält. Diese Anzahl Stunden wird errechnet als Quotient zwischen der \
		zeitlichen Beanspruchung bei normaler Leistungsfähigkeit und der \
		Leistungsfähigkeit, einer Kenngrösse für die Produktivität. Unter \
		extremer Erschöpfung sinkt die Leistungsfähigkeit gegen 0, und die \
		Pflege und Betreuung kann nicht mehr bewältigt werden; um \
		Integrationsfehler zu vermeiden, ist die zeitliche Beanspruchung mit dem \
		Maximalwert Belastung beschränkt; Der Maximalwert Belastung ist so \
		gewählt, dass bei diesem Wert andere Verpflichtungen sowie P&B-Leistung \
		auf 0 sinken. NB: Im Belastungsfall kann die zeitliche Beanspruchung \
		7*24=168 Stunden pro Woche übersteigen; dies steht nicht im Widerspruch \
		zur Definition, sondern bedeutet, dass die PBAP auch mit einem 24h-Tag \
		nicht in der Lage wäre, alle ihre Verpflichtungen so zu bewältigen, dass \
		sie es für angemessen hält.
	|

"P&B Bedarf"= INTEG (
	Inflow Bedarf,
		0)
	~	h/Woche
	~	Zeit pro Woche, die die PBAP bei normaler Leistungsfähigkeit (Referenzwert \
		Leistungsfähigkeit) benötigt, um die Pflege und Betreuung der von ihr \
		betreuten Person, so zu leisten, dass die Pflege und Betreuung aus Sicht \
		der PBAP angemessen ist.
		Der Anfangswert ist gemäss Problemdefinition immer 0, weil die Simulation \
		mit dem Verlust der Unabhängigkeit der gepflegten Person beginnt. Die \
		Person ist genau dann unabhängig, wenn der Bedarf 0 ist.
	~	:SUPPLEMENTARY 
	|

Referenz andere Verpflichtungen= INTEG (
	Exogener Inflow andere Verpflichtungen,
		Anfangswert andere Verpflichtungen)
	~	h/Woche
	~	Referenzverlauf des Stocks andere Verpflichtungen. So würde der Stock \
		sich entwickeln, wenn es keine Einflüsse durch die Pflege- und \
		Betreuungstätigkeit gäbe.
	~	:SUPPLEMENTARY 
	|

Pulse Time Erschöpfung=
	2010
	~	Year
	~		|

Exogener Einfluss Abgabe von Verpflichtungen=
	MAX(0,-Exogener Inflow andere Verpflichtungen)
	~	h/(Woche*Year)
	~	Outflow aus anderen Verpflichtungen, der von exogenen Einflüssen stammt.
	|

Exogener Einfluss Erholung=
	MAX(0,-Exogener Inflow Erschöpfung)
	~	h/Woche
	~	Technische Zwischengrösse.
	|

andere Verpflichtungen= INTEG (
	Aufnahme neuer Verpflichtungen-Abgabe von Verpflichtungen,
		Anfangswert andere Verpflichtungen)
	~	h/Woche
	~	Bestand an Verpflichtungen der PBAP, die nicht direkt mit der Pflege und \
		Betreuung der betreuten Person zusammenhängen. Die Einheit ist h/Woche; \
		damit ist die Anzahl Stunden pro Woche gemeint, die bei normaler \
		Leistungsfähigkeit (Referenzwert) benötigt wird, um diese \
		Verpflichtungen zu bewältigen; mit Verpflichtungen sind Tätigkeiten \
		ausserhalb der P&B gemeint, die eine PBAP wahrnehmen muss, um gemäss \
		ihrer Selbsteinschätzung gegenüber Dritten angemessen zu handeln.
	|

Anfangswert andere Verpflichtungen=
	60
	~	h/Woche
	~	Es wird hier ein Anfangswert gewählt, der der Situation einer \
		berufstätigen Person mit geringen familiären Pflichten bzw. einer Person \
		die ältere Kinder betreut entspricht. Um unterschiedliche \
		Ausgangssituationen zu simulieren, kann dieser Wert variiert werden.
	|

Exogener Inflow Erschöpfung=
	PULSE(Pulse Time Erschöpfung, Pulse Duration Erschöpfung )*Pulse Input Erschöpfung
	~	h/Woche
	~	Einflüsse auf Erschöpfung bzw. Erholung, die unabhängig von den \
		Tätigkeiten in der P&B zustandekommen.
	|

Anfangswert Leistung durch Dritte=
	0
	~	h/Woche
	~	Der Wert ist gemäss Problemdefinition immer 0, weil die Simulation mit \
		dem Verlust der Unabhängigkeit der gepflegten Person beginnt. Ist die \
		Person unahängig, dann sind der Bedarf 0 und auch die Leistung 0.
	|

Anfangswert Leistung durch PBA=
	0
	~	h/Woche
	~	Der Wert ist gemäss Problemdefinition immer 0, weil die Simulation mit \
		dem Verlust der Unabhängigkeit der gepflegten Person beginnt. Ist die \
		Person unahängig, dann sind der Bedarf 0 und auch die Leistung 0.
	|

"P&B-Leistung durch PBAP"= INTEG (
	neuer Bedarf durch PBAP-Bedarfsreduktion an PBA-Entlastung durch Dritte,
		Anfangswert Leistung durch PBA)
	~	h/Woche
	~	Zeit pro Woche, die die PBAP bei Leistungsfähigkeit =1 benötigt, um die \
		Pflege und Betreuung der von ihr gepflegten Person abzüglich des Anteils, \
		der durch Dritte bewältigt wird, so zu leisten, dass die Pflege und \
		Betreuung aus Sicht der PBAP angemessen ist.
	|

Pulse Time andere Verpflichtungen=
	2005
	~	Year
	~		|

Pulse Duration andere Verpflichtungen=
	10
	~	Year
	~		|

Aufnahme neuer Verpflichtungen=
	MAX(0,Exogener Inflow andere Verpflichtungen)
	~	h/(Woche*Year)
	~	Inflow anderer Verpflichtungen aufgrund exogener Veränderungen.
	|

Pulse Duration Inflow Bedarf 1=
	5
	~	Year
	~		|

Pulse Duration Inflow Bedarf 2=
	0.1
	~	Year
	~		|

"Bedarfsreduktion P&B"=
	MAX(0,-Inflow Bedarf)
	~	h/Woche/Year
	~	Technische Zwischengrösse, gleich dem Betrag des Neuen P&B Bedarf, sofern \
		dieser negativ ist; ansonsten 0.
	|

Pulse Input Inflow andere Verpflichtungen=
	0
	~	h/Woche/Year
	~		|

Pulse Input Inflow Bedarf 1=
	12
	~	h/Woche/Year
	~		|

Pulse Input Inflow Bedarf 2=
	1080
	~	h/Woche/Year
	~		|

Exogener Einfluss Erschöpfung=
	MAX(0,Exogener Inflow Erschöpfung)
	~	h/Woche
	~	Technische Zwischengrösse.
	|

Exogener Inflow andere Verpflichtungen=
	PULSE(Pulse Time andere Verpflichtungen, Pulse Duration andere Verpflichtungen)*Pulse Input Inflow andere Verpflichtungen
	~	h/Woche/Year
	~	Veränderungen anderer Verpflichtungen, die kausal auf Veränderungen \
		ausserhalb des Pflege- und Betreuungsarrangements zurückzuführen sind.
	|

Pulse Time Inflow Bedarf 1=
	2005
	~	Year
	~		|

Pulse Time Inflow Bedarf 2=
	2010
	~	Year
	~		|

"P&B Leistung durch Dritte"= INTEG (
	Bedarfsreduktion durch Dritte+Entlastung durch Dritte+neuer Bedarf durch Dritte,
		Anfangswert Leistung durch Dritte)
	~	h/Woche
	~	Zeit pro Woche, die die PBAP bei normaler Leistungsfähigkeit \
		(Referenzwert Leistungsfähigkeit) benötigen würde, um die durch Dritte \
		erbrachten Leistungen selbst und in einer Art zu leisten, wie die PBAP es \
		als angemessen erachtet.
	|

Inflow Bedarf=
	PULSE(Pulse Time Inflow Bedarf 1, Pulse Duration Inflow Bedarf 1)*Pulse Input Inflow Bedarf 1\
		+ PULSE(Pulse Time Inflow Bedarf 2, Pulse Duration Inflow Bedarf 2)*Pulse Input Inflow Bedarf 2
	~	h/Woche/Year
	~	Veränderungsrate des Pflege- und Betreuungsbedarfs. Der Bedarf ist \
		ausgedrückt in h/Woche, die die PBAP bei Leistungsfähigkeit=1 benötigt, \
		um die Pflege und Betreuung so zu bewältigen, wie sie es selbst als \
		angemessen erachtet.
	|

Pulse Input Erschöpfung=
	0
	~	h/Woche
	~		|

"Neuer P&B-Bedarf"=
	MAX(Inflow Bedarf,0)
	~	h/Woche/Year
	~	Technische Zwischengrösse, gleich dem Neuen P&B Bedarf, sofern dieser \
		postiv ist.
	|

Pulse Duration Erschöpfung=
	5
	~	Year
	~		|

Abgabe von Verpflichtungen=
	MIN(MAX(0,subjektiv wahrgenommene Überlastung*andere Verpflichtungen/zeitliche Beanspruchung unter Referenzwert Leistungsfähigkeit\
		/Abgabezeit*0.5+Exogener Einfluss Abgabe von Verpflichtungen
	),Max Outflow akk Verpflichtungen)
	~	h/(Woche*Year)
	~	Abgabe anderer Verpflichtungen: Summe der Abgabe aufgrund von Überlastung \
		sowie der exogenen Einflüsse. Die MIN/MAX Funktion verhindert einen \
		negativen Bestand der anderen Verpflichtungen.
	|

Abgabezeit=
	EXP(Priorität anderer Verpflichtungen)*Anpassungszeit Entlastung
	~	Year
	~	Bei Priorität 0 erfolgt die Anpassung anderer Verpflichtungen gleich \
		schnell wie die Entlastung von P&B bei idealer Selbstmanagementfähigkeit; \
		P&B und andere Verpflichtungen werden also gleichbehandelt.Begründung \
		für die exponentielle Formulierung: Es wurde empirisch sowohl starke \
		Priorität anderer Verpflichtungen als auch sehr geringe Priorisierung \
		anderer Verpflichtungen beobachtet, im Vergleich zur P&B. Durch die \
		exponentielle Formulierung kann mit einstelligen negativen Werten sehr \
		geringe Priorität bis zu neutraler Priorität gegemüber P&B simuliert \
		werden; durch einstellige positive Werte können neutrale Haltungen bis zu \
		starker Priorisierung anderer Verpflichtungen simuliert werden.
	|

Entlastung durch Dritte=
	MIN("Max Outflow PB-Leistung",subjektiv wahrgenommener Entlastungsbedarf*"P&B-Leistung durch PBAP"\
		/zeitliche Beanspruchung unter Referenzwert Leistungsfähigkeit/Anpassungszeit Entlastung\
		)
	~	h/(Year*Woche)
	~	Rate, mit der zuvor durch die PBAP erbrachte Leistungen neu durch Dritte \
		erbracht werden. Die Masseinheit für die Leistungen ist [h/Woche], \
		quantifiziert gemäss der Definition von P&B Leistung durch PBAP.
	|

Inflow Erschöpfung=
	subjektiv wahrgenommene Überlastung+Exogener Einfluss Erschöpfung
	~	h/Woche
	~	Zunahme der Erschöpfung; als Summe von Überlastung und exogenen \
		Einflüssen.
	|

Entlastungsfähigkeit PBA=
	MAX(Minimalwert Entlastungsfähigkeit,(1-relative Aneignung durch die PBAP)^Sensitivität der Entlastungsfähigkeit\
		)
	~	1
	~	Gem. qualitativem Modell besteht eine Kausalität mit negativer Polarität \
		zwischen relativem Grad der Aneigung und Entlastung durch Dritte. Hier ist \
		die Entlastungsfähigkeit als Faktor zwischengeschaltet, der mit der \
		Überlastung multipliziert wird. Die Entlastungsfähigkeit hängt ab von \
		der Rollenaneignung (negative Polarität) sowie der \
		Selbstmanagementfähigkeit (positive Polarität). Die Basis (1- relative \
		Aneignung durch die PBAP) nimmt Werte zwischen 0 und 1 an. Der Exponent \
		ist der Kehrwert der Selbstmanagementfähigkeit und nimmt Werte zwischen \
		0+eps und unendlich an; Die Entlastungsfähigkeit nimmt also Werte \
		zwischen 0 und 1 an, wobei sie bei sehr hoher Selbstmanagementfähigkeit \
		konstant gegen 1, bei sehr geringer Selbstmanagementfähigkeit konstant \
		gegen 0 und bei Selbstmangagementfähigkeit = 1 linear zw. 1 und 0 \
		verläuft (umgekehrt proportional zur relativen Aneignung). Die \
		Entlastungsfähigkeit sinkt nicht unter einen sehr kleinen Minimalwert. Im \
		Fall extremer Überlastung nehmen wir im Modell an, dass es zu einem \
		Zusammenbruch der PBAP bzw. des Arrangements kommt, der \
		Entlastungsmassnahmen zur Folge hat (z.B. notfallmässiger Heimeintritt \
		der gepflegten Person). Damit das Modell diesen Spezialfall korrekt \
		abbildet, ist der Minimalwert >0 gewählt.
	|

Minimalwert Entlastungsfähigkeit=
	10000/Maximalwert subjektiv wahrgenommene Belastung
	~	1
	~	Auch wenn die Aneignung sehr gross ist, gibt es ein Mass an Belastung, bei \
		dem die P&B nicht mehr geleistet werden kann. Sinkt die \
		Leistungsfähigkeit gegen 0, dann steigt die maximale Belastung gegen \
		unendlich, ist aber durch den Maximalwert begrenzt, um numerische Fehler \
		zu vermeiden. Wenn dieser Maximalwert erreicht wird, wird durch den \
		Minimalwert Entlastungsfähigkeit sichergestellt, dass in diesem Fall die \
		PBAP durch Dritte entlastet wird.
	|

Grad der Aneignung PBAP=
	"P&B-Leistung durch PBAP"*Ablösungszeit*Wochen pro Jahr+Grundwert Aneignung durch Dritte\
		*EXP(Antizipationsgrad)
	~	h
	~	Die im Verlauf der Pflege- und Betreuungstätigkeit akkumulierte Aneignung \
		der Rolle wird durch den ersten Term bezeichnet, gem. Definitionen der \
		betr. Parameter. Dieser wird zum zweiten Term addiert, der die \
		Rollenantizipation vor Beginn der P&B bezeichnet. Bei einem \
		Antizipationsgrad von 0 ist die Antizipation der Rolle durch die PBAP gem. \
		Definition des Antizipationsgrad neutral im Vergleich zu Drittpersonen, \
		also gleich stark (Grad der Aneigung PBAP zum Zeitpunkt 0 = Grad der \
		Aneignung durch Dritte, weil EXP(Antizipationsgrad) = 1.) Bei Werten > 0 \
		bzw. <0 des Antizipationsgrad wird der Antizipationsterm exponentiell \
		zwischen 0 und unendlich modifiziert. Begründung für die exponentielle \
		Formulierung: Es wurde empirisch sowohl starke Ablehnung der Rolle als \
		auch starke Antizipation beobachtet. Durch die exponentielle Formulierung \
		kann mit einstelligen negativen Werten Ablehnung der Rolle bis zu \
		neutraler Haltung gegenüber der Rolle simuliert werden; durch einstellige \
		positive Werte können neutrale Haltungen bis zu starker \
		Rollenantizipation simuliert werden; diese Modellparametrisierung \
		erscheint intuitiv.
	|

subjektiv wahrgenommene Belastung=
	IF THEN ELSE(zeitliche Beanspruchung/Referenzwert zeitliche Beanspruchung>=Maximalwert subjektiv wahrgenommene Belastung\
		, Maximalwert subjektiv wahrgenommene Belastung, (zeitliche Beanspruchung/Referenzwert zeitliche Beanspruchung\
		)^Sensitivität der subjektiven Belastung )
	~	1
	~	Die subjektiv wahrgenommene Belastung beschreibt die Einschätzung der \
		pflegenden/betreuenden angehörigen Person zur Aussage "Ich fühle mich \
		belastet." Werte nahe bei 1 bzw. zwischen 0 und 1 stehen für \
		Einschätzungen Trifft nicht zu/Trifft eher nicht zu; Werte zwischen 1 und \
		unendlich stehen für Einschätzungen Trifft eher zu/Trifft zu.
		
		Die subjektiv wahrgenommene Belastung ist eine nichtlineare Funktion der mit einem \
		Referenzwert normalisierten zeitlichen Beanspruchung; der normalisierte \
		Wert wird mit dem Exponenten 1/Belastbarkeit potenziert; bei hoher \
		Belastbarkeit (>> 1) reagiert die subjektiv wahrgenommene Belastung somit \
		nicht sensitiv auf die zeitliche Beanspruchung und verbleibt nahe bei 1; \
		bei geringer Belastbarkeit (zw. 0 und 1) reagiert die subjektiv \
		wahrgenommene Belastung sensitiv auf zeitliche Beanspruchungen, die den \
		Referenzwert übersteigen.
		
		Um numerische Fehler zu vermeiden, ist die subjektiv wahrgenommene \
		Belastung gegen oben begrenzt; die obere Grenze ist so gewählt, dass ihr \
		Erreichen dazu führt, dass die Verpflichtungen der PBAP gegen 0 sinken, \
		da sie diese nicht mehr bewältigen kann.
	|

Maximalwert Belastung=
	Maximalwert subjektiv wahrgenommene Belastung^Exponent maximale aktuelle Belastung*Referenzwert zeitliche Beanspruchung
	~	h/Woche
	~	Es wird ein Maximalwert der Beanspruchung errechnet, der unabhängig der \
		anderen Modellparameter genügend hoch ist, so dass beim Erreichen dieses \
		Werts die Verpflichtungen der PBAP auf 0 reduziert werden.
	|

Referenzwert Erschöpfung=
	Referenzwert zeitliche Beanspruchung*Erholungszeit
	~	h*Year/Woche
	~	Als Referenzwert für die Erschöpfung wird der Referenzwert zeitliche \
		Beanspruchung mit der Erholungszeit multipliziert; die akkumulierte \
		Überlastung in h/Woche*Year wird also bei der Normalisierung ins \
		Verhältnis gesetzt zum Produkt von der belastungsfreien \
		(Sorge-)Arbeitswoche [h/Woche] und der Zeitkonstante [Year], die zur \
		Regeneration bestehender akkumulierter Erschöpfungszustände nötig ist.
	|

Sensitivität der Entlastungsfähigkeit=
	1/Selbstmanagementfähigkeit
	~	1
	~	Kehrwert der Selbstmanagementfähigkeit, technische Hilfsgrösse.
	|

Sensitivität der subjektiven Belastung=
	1/Belastbarkeit
	~	1
	~	Kehrwert der Belastbarkeit.
	|

Selbstmanagementfähigkeit=
	1
	~	1 [0.1,10,0.1]
	~	Die Selbstmanagementfähigkeit bezeichnet die Fähigkeit des \
		P&B-Arrangements, bei gegebenem Rollenverständnis der PBAP Belastungen \
		dieser Person zu erkennen und darauf mit Entlastung zu reagieren. Sie \
		hängt ab von sozialen und wirtschaftlichen Ressourcen des Arrangements \
		sowie kognitiven und psychischen Ressourcen der PBAP und von Personen \
		ihres Umfelds. Sie ist dimensionslos parametrisiert zwischen 0+eps und \
		unendlich; ist der Wert sehr klein, dann führt bereits eine geringe \
		Rollenaneignung zu einer sehr unflexiblen Reaktion auf Belastungen; bei \
		sehr grossen Werten kann das Arrangment auch bei starker Rollenaneignung \
		rasch auf Überlastungen reagieren. Empirisch wurde die ganze Bandbreite \
		von Verhaltensmuster beobachtet. Um die unterschiedlichen \
		Entwicklungsmuster des SYstems zu verstehen, sollte eine \
		Sensitivitätsanalyse über diesen Parameter durchgeführt werden.
	|

Belastbarkeit=
	2
	~	1 [0.1,10,0.1]
	~	Der Parameter beschreibt, wie stark die zeitliche Beanspruchung durch \
		andere Verpflichtungen sowie durch die P&B, welche den Referenzwert \
		zeitliche Beanspruchung übersteigt, auf die subjektiv empfundene \
		Belastung wirkt. Ein grosser einstelliger Wert (deutlich über 1) \
		beschreibt eine PBAP, die sehr grosse zeitliche Beanspruchung (im \
		Extremfall mehr als 24h pro Tag, siehe def. zeitl. Beanspruchung) \
		bewältigen kann, ohne subjektiv belastet zu sein; derart belastbare PBAP \
		wurden empirisch beobachtet. Bei kleiner Belastbarkeit (0<Belastbarkeit<1) \
		fühlt sich eine PBAP subjektiv stark belastet, wenn die zeitl. \
		Beanspruchung den Referenzwert nur wenig überschreitet. Auch solche PBAP \
		wurden beobachet; um das Spektrum der Entwicklungsmuster zu verstehen, \
		muss eine Sensitivitätsanalyse auf diesem Parameter durchgeführt werden.
	|

Anteil der Leistung durch PBAP=
	ZIDZ("P&B-Leistung durch PBAP","P&B Leistung durch Dritte"+"P&B-Leistung durch PBAP"\
		)
	~	1
	~	Anteil der Leistung der PBAP am Bedarf.
	|

Erholung=
	MIN(Erschöpfung*Max Flow Rate,Erschöpfung/Erholungszeit+Exogener Einfluss Erholung\
		)
	~	h/Woche
	~	Endogene Erholung proportional zur Erschöpfung.
	|

Bedarfsreduktion durch Dritte=
	(1-Anteil der Leistung durch PBAP)*"Bedarfsreduktion P&B"
	~	h/(Year*Woche)
	~	Eine Bedarfsabnahme wird proportional zur aktuellen P&B Leistung \
		aufgeteilt. Es gibt hierzu keine Daten, es ist eine Annahme - für die \
		Schlussfolgerungen aus dem Modell unerheblich, da diese die Dynamik bei \
		steigendem Bedarf betreffen.
	|

Bedarfsreduktion an PBA=
	"Bedarfsreduktion P&B"*Anteil der Leistung durch PBAP
	~	h/(Year*Woche)
	~	Eine Bedarfsabnahme wird proportional zur aktuellen P&B Leistung \
		aufgeteilt. Es gibt hierzu keine Daten, es ist eine Annahme - für die \
		Schlussfolgerungen aus dem Modell unerheblich, da diese die Dynamik bei \
		steigendem Bedarf betreffen.
	|

Exponent maximale aktuelle Belastung=
	MIN(1,XIDZ(1,Sensitivität der subjektiven Belastung,1))
	~	1
	~	Es wird sichergestellt, dass die obere Grenze der zeitlichen Beanspruchung \
		genügend hoch ist, damit beim Erreichen dieser Grenze die Verpflichtungen \
		der PBAP auf 0 reduziert werden.
	|

Wochen pro Jahr=
	52
	~	Woche/Year
	~	Anzahl Wochen pro Jahr, für die Umrechnung der Einheiten.
	|

Ablösungszeit=
	1
	~	Year
	~	Die mittlere Zeit des Vergessens von Rollenzuschreibungen. Ohne Quelle, \
		Schätzung.
	|

Grundwert Aneignung durch Dritte=
	100
	~	h
	~	Die absolute Ausprägung der Aneignung durch Drittpersonen. Der Wert von \
		100 h entspricht bei einer Ablösungszeit von 1 Jahr einer P&B Leistung \
		von 2 h/Woche. Das bedeutet, dass eine Person ohne Antizipation der \
		Pflege- und Betreuungsrolle, d. h. eine Person, die die hilfebedürftige \
		Person vorher nicht kennt (z.B. Nachbarin), ab ca. 2 h/Woche \
		Pflegeleistung in die Situation kommt, dass ihr weitere Aufgaben gleich \
		stark angetragen werden wie der betreffenden Drittperson, die den \
		Grundwert der Aneignung von 100 h hat. Der Wert ist nicht in der Literatur \
		abgestützt. Aber es scheint plausibel, dass er z. B. einem Aneignungswert \
		von Spitexorganisationen entspricht. Ist ein Nachbar 2 h/Wochen an der \
		Pflege/Betreuung beteiligt und hat freie Kapazitäten, dann könnten \
		weitere Bedarfe ähnlicher Art durchaus durch ihn statt die Spitex \
		bewältigt werden, auch wenn vor der Hilfebedürftigkeit keine Beziehung \
		bestand.
	|

Grad der Aneignung Dritte=
	"P&B Leistung durch Dritte"*Ablösungszeit*Wochen pro Jahr+Grundwert Aneignung durch Dritte
	~	h
	~	Grad der Aneignung der P&B durch Dritte. Analog Grad der Aneingnung durch \
		die PBAP definiert.
	|

relative Aneignung durch die PBAP=
	Grad der Aneignung PBAP/(Grad der Aneignung Dritte+Grad der Aneignung PBAP)
	~	1
	~	Relativer Grad der Aneignung der PBAP, gem. qualitativem Modell die \
		wesentliche Grösse zur Aufteilung zusätzlicher P&B-Bedarfe.
	|

subjektiv wahrgenommener Entlastungsbedarf=
	MAX(0,subjektiv wahrgenommene Überlastung*Entlastungsfähigkeit PBA)
	~	h/Woche
	~		|

Anfangswert Erschöpfung=
	0
	~	h*Year/Woche
	~		|

Erschöpfung= INTEG (
	Inflow Erschöpfung-Erholung,
		Anfangswert Erschöpfung)
	~	h/Woche*Year
	~	Die Erschöpfung wird als Akkumulation der Überlastung modelliert.
	|

Antizipationsgrad=
	0
	~	1 [-6,4,0.5]
	~	Der Antizipationsgrad bezeichnet, inwiefern die PBAP die Rolle als \
		pflegende und betreueunde angehörige Person der betreffenden \
		hilfebedürftigen Person unmittelbar vor deren Verlust der Unabhängigkeit \
		antizipiert, bzw. inwiefern diese Rolle ihr vom Umfeld zugeschrieben wird. \
		Ein Wert von 0 entspricht einer Situation, in der die PBAP und ihr Umfeld \
		neutral auf die Frage antworten, ob die PBAP im Bedarfsfall die P&B \
		übernehmen würde/sollte. Ein Wert >0 entspricht einer Situation, in der \
		die Rolle der PBAP zugeschrieben wird bzw. sie sich diese selbst \
		zuschreibt. Je grösser der Wert, desto eindeutiger. Umgekehrt entsprechen \
		Werte <0 einer Situation, in der die Rolle einer Drittperson oder einer \
		prof. Organisation zugeschrieben wird.
	|

Max Outflow akk Verpflichtungen=
	andere Verpflichtungen*Max Flow Rate
	~	h/(Year*Woche)
	~	Maximaler Outflow anderer Verpflichtungen, da ein negativer Bestand \
		anderer Verpflichtungen nicht möglich ist.
	|

zeitliche Beanspruchung unter Referenzwert Leistungsfähigkeit=
	andere Verpflichtungen+"P&B-Leistung durch PBAP"
	~	h/Woche
	~	Zeit pro Woche, die die PBAP bei normaler Leistungsfähigkeit benötigt, \
		um alle ihre Verpflichtungen zu bewältigen.
	|

Maximalwert subjektiv wahrgenommene Belastung=
	1e+12
	~	1
	~	Der Maximalwert der subjektiv empfundenen Belastung wird genügend hoch \
		gewählt, so dass damit nur numerische Fehler vermieden werden, das \
		Modellverhalten bei normalen Werten aber nicht beeinflusst wird.
	|

Anpassungszeit Entlastung=
	0.1
	~	Year
	~	Zeitkonstante für die Entlastung bei Überlastung der PBAP in \
		Arrangements mit idealem Selbstmanagement. Es wird ein kleiner Wert in der \
		Grössenordnung eines Monats gewählt. Dieselbe Zeitkonstante wird \
		verwendet für die Anpassung anderer Verpflichtungen, sofern deren \
		Priorität 0 ist.
	|

Max Flow Rate=
	20
	~	1/Year
	~	Genügend grosse maximale Flussrate, damit rasche Entlastung möglich ist, \
		aber keine numerischen Fehler auftreten.
	|

neuer Bedarf durch PBAP=
	relative Aneignung durch die PBAP*"Neuer P&B-Bedarf"
	~	h/(Year*Woche)
	~	Aufteilung des zusätzlichen Bedarfs gem. Definition relative Aneignung.
	|

neuer Bedarf durch Dritte=
	(1-relative Aneignung durch die PBAP)*"Neuer P&B-Bedarf"
	~	h/(Year*Woche)
	~	Aufteilung des zusätzlichen Bedarfs gem. Definition relative Aneignung.
	|

"Max Outflow PB-Leistung"=
	"P&B-Leistung durch PBAP"*Max Flow Rate
	~	h/(Woche*Year)
	~	Stellt sicher, dass die P&B Leistung nicht negativ wird.
	|

"X0 der S-Kurvenfunktion Leistungsfähigkeit"=
	LN(-Maximalwert normalisierte Leistungsfähigkeit/(1-Maximalwert normalisierte Leistungsfähigkeit\
		)-1)+Responsivität der Leistungsfähigkeit
	~	1
	~	Der Achsenabschnitt x0 der logistischen Funktion wird so festgelegt, dass \
		bei einer normalisierten Erschöpfung von 1 die normalisierte \
		Leistungsfähigkeit genau 1 beträgt.
	|

Leistungsfähigkeit=
	Maximalwert normalisierte Leistungsfähigkeit-Maximalwert normalisierte Leistungsfähigkeit\
		/(1+EXP(-Responsivität der Leistungsfähigkeit*Normalisierte Erschöpfung+"X0 der S-Kurvenfunktion Leistungsfähigkeit"\
		))
	~	1
	~	Leistungsfähigkeit als nichtlineare Funktion der normalisierten Erschöpfung \
		(negative S-Kurvenförmige Beziehung, logistische Funktion). Die S-Kurve \
		wird definiert durch die Parameter 
		1. Maximalwert der normalisierten Leistungsfähigkeit: bei einer normalisierten \
		Erschöpfung von 0 entspricht die normalisierte Leistungsfähigkeit genau \
		diesem Wert
		2. k: Responsivität--> Wie rasch nimmt die Leistungsfähigkeit ab, wenn die \
		normalisierte Erschöpfung über 1 steigt; Responsitivität 0 --> die \
		Leistungsfähigkeit reagiert nicht auf die Erschöpfung; Responsivität \
		unendlich: die Leistungsfähigkeit reagiert sprungartig auf die \
		Erschöpfung.
		3. x0: Achsenabschnitt, stellt sicher, dass bei Input "normalisierte \
		Erschöpfung" = 1 (keine akkumulierte Erschöpfung) der Output genau 1 ist  \
		(optimale Leistungsfähigkeit).
	|

Maximalwert normalisierte Leistungsfähigkeit==
	1.2
	~	1
	~	Die Parameterwerte der Beziehung zwischen normalisierter Erschöpfung und \
		Leistungsfähigkeit wurden aufgrund von 3 rekonstruierten Zeitverläufen \
		von P&B-Arrangements mit PBA geschätzt. Bei diesen drei Verläufen kam es \
		in zwei Verläufen zur Dominanz selbstverstärkender Erschöpfung, im \
		dritten nicht. In der Rekonstruktion wurden die Verläufe der subjektiv \
		wahrgenommenen Belastung, der P&B-Leistung durch PBAP sowie durch Dritte \
		sowie Veränderungen der anderen Verpflichtungen rekonstruiert; die \
		anderen Modellparameter wurden ebenfalls geschätzt. Dann wurden die \
		Parameter "Maximalwert normalisierte Leistungsfähigkeit" sowie \
		"Responsivität der Leistungsfähigkeit" so geschätzt, dass das Quadrat \
		des Fehlers auf den beobachteten Verläufen minimiert wird. Anschliessend \
		wurden diese Parameter konstant belassen. Die Werte wurden dann validiert, \
		indem für die weiteren 15 rekonstruierten Fallverläufe untersucht wurde, \
		ob der Loop der selbstverstärkenden Belastung so reagiert, dass die \
		wesentlichen Merkmale der Fallverläufe mit dem Modell plausibel \
		nachgebildet werden können. Da dieser Test bestanden wurde, werden diese \
		Modellkonstanten nicht weiter variiert und als unveränderlich festgelegt.
	|

Responsivität der Leistungsfähigkeit=
	1.5
	~	1
	~	Die Parameterwerte der Beziehung zwischen normalisierter Erschöpfung und \
		Leistungsfähigkeit wurden aufgrund von 3 rekonstruierten Zeitverläufen \
		von P&B-Arrangements mit PBA geschätzt. Bei diesen drei Verläufen kam es \
		in zwei Verläufen zur Dominanz selbstverstärkender Erschöpfung, im \
		dritten nicht. In der Rekonstruktion wurden die Verläufe der subjektiv \
		wahrgenommenen Belastung, der P&B-Leistung durch PBAP sowie durch Dritte \
		sowie Veränderungen der anderen Verpflichtungen rekonstruiert; die \
		anderen Modellparameter wurden ebenfalls geschätzt. Dann wurden die \
		Parameter "Maximalwert normalisierte Leistungsfähigkeit" sowie \
		"Responsivität der Leistungsfähigkeit" so geschätzt, dass das Quadrat \
		des Fehlers auf den beobachteten Verläufen minimiert wird. Anschliessend \
		wurden diese Parameter konstant belassen. Die Werte wurden dann validiert, \
		indem für die weiteren 15 rekonstruierten Fallverläufe untersucht wurde, \
		ob der Loop der selbstverstärkenden Belastung so reagiert, dass die \
		wesentlichen Merkmale der Fallverläufe mit dem Modell plausibel \
		nachgebildet werden können. Da dieser Test bestanden wurde, werden diese \
		Modellkonstanten nicht weiter variiert und als unveränderlich festgelegt.
	|

Normalisierte Erschöpfung=
	(Erschöpfung+Referenzwert Erschöpfung)/Referenzwert Erschöpfung
	~	1
	~	Normalisierte Erschöpfung (vgl. Definition Referenzwert Erschöpfung bzw. \
		Definition Erschöpfung). Ein normalisierter Wert von 1 bezeichnet eine \
		Situation ohne akkumulierte Erschöpfung, ein Wert von z. B. 2 bezeichnet \
		eine Erschöpfung von 1xReferenzwert Erschöpfung.
	|

Erholungszeit=
	0.5
	~	Year
	~	Zeitkonstante der Erholung; ohne Quelle, eigene Einschätzung.
	|

Priorität anderer Verpflichtungen=
	0
	~	1 [-4,6,0.5]
	~	Bei einem Wert von 0 werden im Überlastungsfall und\ 
		gleichzeitig idealem Selbstmanagement weder andere Verpflichtungen noch \
		P&B priorisiert; beide werden im gleichen Mass reduziert; bei negativen \
		Werten wird P&B priorisiert und andere Verpflichtungen werden prioritär \
		abgebaut; bei positiven Werten werden andere Verpflichtungen priorisiert \
		und P&B wird prioritär abgebaut.
	|

Referenzwert zeitliche Beanspruchung=
	48
	~	h/Woche [5,200]
	~	Totale zeitliche Beanspruchung (Pflege/Betreuung plus andere \
		Verpflichtungen), die keine Überlastung verursacht.
	|

********************************************************
	.Control
********************************************************~
		Simulation Control Parameters
	|

FINAL TIME  = 2015
	~	Year
	~	The final time for the simulation.
	|

INITIAL TIME  = 2005
	~	Year
	~	The initial time for the simulation.
	|

SAVEPER  = 
        TIME STEP
	~	Year [0,?]
	~	The frequency with which output is stored.
	|

TIME STEP  = 0.015625
	~	Year [0,?]
	~	The time step for the simulation.
	|

\\\---/// Sketch information - do not modify anything except names
V300  Do not put anything below this section - it will be ignored
*Titel
$192-192-192,0,Times New Roman|12||0-0-0|0-0-0|0-0-255|-1--1--1|-1--1--1|96,96,5,0
12,1,0,594,155,331,47,8,135,0,40,-1,0,0,0,-1--1--1,0-0-0,Arial|24||0-0-0
Das dynamische Modell der Angehörigenpflege- und betreuung
12,2,0,589,305,112,36,8,135,0,32,-1,0,0,0,-1--1--1,0-0-0,Arial|12||0-0-0
Autor: Alexander Scheidegger, Institut für Modellbildung und Simulation, FHS St.Gallen, 05.12.2018
\\\---/// Sketch information - do not modify anything except names
V300  Do not put anything below this section - it will be ignored
*Erschöpfungsspirale
$192-192-192,0,Times New Roman|12||0-0-0|0-0-0|0-0-255|-1--1--1|-1--1--1|96,96,5,0
10,1,subjektiv wahrgenommene Belastung,880,516,84,19,8,3,0,0,0,0,0,0
10,2,Erschöpfung,832,220,85,33,3,131,0,0,0,0,0,0
10,3,zeitliche Beanspruchung unter Referenzwert Leistungsfähigkeit,699,786,75,28,8,3,0,0,0,0,0,0
1,4,2,33,1,0,43,0,2,64,0,-1--1--1,|12||0-0-0,1|(580,237)|
10,5,Sensitivität der subjektiven Belastung,1000,400,69,19,8,3,0,0,0,0,0,0
1,6,5,1,1,0,45,0,2,64,0,-1--1--1,|12||0-0-0,1|(958,448)|
10,7,andere Verpflichtungen,1537,652,107,49,3,131,0,0,0,0,0,0
12,8,2,711,298,23,23,5,3,0,0,-1,0,0,0
12,9,0,793,320,40,19,8,7,0,0,-1,0,0,0
Akute Erschöpfung
12,10,1,1366,696,23,23,4,3,0,0,-1,0,0,0
10,11,Referenzwert zeitliche Beanspruchung,1069,588,58,19,8,3,0,0,0,0,0,0
1,12,7,3,1,0,0,0,0,64,0,-1--1--1,,1|(1438,758)|
1,13,3,43,1,0,0,0,0,64,0,-1--1--1,,1|(690,668)|
10,14,subjektiv wahrgenommene Überlastung,1143,489,54,28,8,131,0,0,0,0,0,0
1,15,11,1,1,0,0,0,0,64,0,-1--1--1,,1|(981,554)|
1,16,1,14,1,0,0,0,0,64,0,-1--1--1,,1|(1001,480)|
10,17,Priorität anderer Verpflichtungen,900,739,52,19,8,3,0,0,0,0,0,0
10,18,Referenzwert Erschöpfung,251,258,43,19,8,3,0,0,0,0,0,0
1,19,18,33,1,0,0,0,0,64,0,-1--1--1,,1|(310,287)|
12,20,48,837,78,10,8,0,3,0,0,-1,0,0,0
1,21,23,20,4,0,0,22,0,0,0,-1--1--1,,1|(838,104)|
1,22,23,2,100,0,0,22,0,0,0,-1--1--1,,1|(838,161)|
11,23,48,838,129,8,6,33,3,0,0,4,0,0,0
10,24,Erholung,875,129,29,11,40,3,0,0,-1,0,0,0
10,25,Erholungszeit,720,103,42,11,8,3,0,0,0,0,0,0
1,26,2,24,1,0,0,0,0,64,0,-1--1--1,,1|(894,158)|
1,27,25,24,1,0,0,0,0,64,0,-1--1--1,,1|(769,132)|
12,28,48,1075,208,10,8,0,3,0,0,-1,0,0,0
1,29,31,2,4,0,0,22,0,0,0,-1--1--1,,1|(952,213)|
1,30,31,28,100,0,0,22,0,0,0,-1--1--1,,1|(1032,213)|
11,31,48,993,213,6,8,34,3,0,0,1,0,0,0
10,32,Inflow Erschöpfung,993,240,40,19,40,3,0,0,-1,0,0,0
10,33,Normalisierte Erschöpfung,473,292,43,19,8,3,0,0,0,0,0,0
10,34,Erholungszeit,376,152,51,11,8,2,0,3,-1,0,0,0,128-128-128,0-0-0,|12||128-128-128
1,35,34,18,1,0,0,0,0,64,0,-1--1--1,,1|(366,166)|
1,36,33,37,1,0,0,0,0,64,0,-1--1--1,,1|(403,333)|
10,37,Leistungsfähigkeit,395,387,55,11,8,3,0,0,0,0,0,0
10,38,Anfangswert Erschöpfung,716,161,41,19,8,3,0,0,0,0,0,0
10,39,Maximalwert normalisierte Leistungsfähigkeit,577,320,56,28,8,3,0,0,0,0,0,0
10,40,Responsivität der Leistungsfähigkeit,568,462,56,19,8,131,0,0,0,0,0,0
1,41,39,45,1,0,0,0,0,64,0,-1--1--1,,1|(590,333)|
1,42,40,45,1,0,0,0,0,64,0,-1--1--1,,1|(618,405)|
10,43,zeitliche Beanspruchung,742,578,49,19,8,3,0,0,0,0,0,0
1,44,38,2,0,0,0,0,0,64,1,-1--1--1,,1|(753,180)|
10,45,"X0 der S-Kurvenfunktion Leistungsfähigkeit",546,391,57,28,8,3,0,0,0,0,0,0
1,46,45,37,1,0,0,0,0,64,0,-1--1--1,,1|(470,370)|
1,47,40,37,1,0,0,0,0,64,0,-1--1--1,,1|(465,466)|
1,48,39,37,1,0,0,0,0,64,0,-1--1--1,,1|(464,351)|
10,49,"P&B-Leistung durch PBAP",253,696,51,19,8,2,0,3,-1,0,0,0,128-128-128,0-0-0,|12||128-128-128
1,50,49,3,1,0,0,0,0,64,0,-1--1--1,,1|(427,841)|
12,51,48,1814,655,10,8,0,3,0,0,-1,0,0,0
1,52,54,7,4,0,0,22,0,0,0,-1--1--1,,1|(1681,657)|
1,53,54,51,100,0,0,22,0,0,0,-1--1--1,,1|(1767,657)|
11,54,48,1725,657,6,8,34,3,0,0,1,0,0,0
10,55,Aufnahme neuer Verpflichtungen,1725,684,52,19,40,3,0,0,-1,0,0,0
12,56,48,1092,659,10,8,0,3,0,0,-1,0,0,0
1,57,59,56,4,0,0,22,0,0,0,-1--1--1,,1|(1153,655)|
1,58,59,7,100,0,0,22,0,0,0,-1--1--1,,1|(1325,655)|
11,59,48,1213,655,8,6,33,3,0,0,4,0,0,0
10,60,Abgabe von Verpflichtungen,1271,655,50,19,40,3,0,0,-1,0,0,0
1,61,7,65,1,0,0,0,0,64,0,-1--1--1,,1|(1388,744)|
1,62,14,60,1,0,0,0,0,64,0,-1--1--1,,1|(1210,539)|
10,63,Maximalwert subjektiv wahrgenommene Belastung,758,384,86,19,8,3,0,0,0,0,0,0
1,64,63,81,1,0,0,0,0,64,0,-1--1--1,,1|(713,417)|
10,65,Max Outflow akk Verpflichtungen,1285,773,57,19,8,3,0,0,0,0,0,0
10,66,Max Flow Rate,1115,828,48,19,8,2,0,3,-1,0,0,0,128-128-128,0-0-0,|12||128-128-128
1,67,66,65,1,0,0,0,0,64,0,-1--1--1,,1|(1174,842)|
1,68,65,60,1,0,0,0,0,64,0,-1--1--1,,1|(1253,710)|
1,69,43,1,0,0,0,0,0,64,0,-1--1--1,,1|(804,549)|
1,70,14,32,1,0,0,0,0,64,0,-1--1--1,,1|(1118,329)|
10,71,Referenzwert zeitliche Beanspruchung,91,286,62,19,8,2,0,3,-1,0,0,0,128-128-128,0-0-0,|12||128-128-128
1,72,71,18,1,0,0,0,0,64,0,-1--1--1,,1|(134,293)|
10,73,Exogener Einfluss Abgabe von Verpflichtungen,1353,520,56,28,8,3,0,0,0,0,0,0
1,74,73,60,1,0,0,0,0,64,0,-1--1--1,,1|(1295,580)|
10,75,Exogener Einfluss Erholung,961,71,56,19,8,3,0,0,0,0,0,0
10,76,Exogener Einfluss Erschöpfung,1118,139,56,19,8,3,0,0,0,0,0,0
1,77,75,24,1,0,0,0,0,64,0,-1--1--1,,1|(922,104)|
1,78,76,31,1,0,0,0,0,64,0,-1--1--1,,1|(1037,177)|
10,79,Max Flow Rate,984,144,59,11,8,2,0,3,-1,0,0,0,128-128-128,0-0-0,|12||128-128-128
1,80,79,24,1,0,0,0,0,64,0,-1--1--1,,1|(936,122)|
10,81,Maximalwert Belastung,717,493,42,19,8,3,0,0,0,0,0,0
10,82,Referenzwert zeitliche Beanspruchung,603,517,62,19,8,2,0,3,-1,0,0,0,128-128-128,0-0-0,|12||128-128-128
1,83,82,81,1,0,0,0,0,64,0,-1--1--1,,1|(669,506)|
1,84,5,86,1,0,0,0,0,64,0,-1--1--1,,1|(901,410)|
1,85,81,43,1,0,0,0,0,64,0,-1--1--1,,1|(739,537)|
10,86,Exponent maximale aktuelle Belastung,848,441,65,19,8,3,0,0,0,0,0,0
1,87,86,81,1,0,0,0,0,64,0,-1--1--1,,1|(791,480)|
10,88,Belastbarkeit,985,333,42,11,8,3,0,0,0,0,0,0
1,89,88,5,1,0,0,0,0,64,0,-1--1--1,,1|(1022,373)|
10,90,Abgabezeit,1099,703,36,11,8,3,0,0,0,0,0,0
1,91,90,60,1,0,0,0,0,64,0,-1--1--1,,1|(1164,688)|
1,92,17,90,1,0,0,0,0,64,0,-1--1--1,,1|(976,715)|
1,93,63,1,1,0,0,0,0,64,0,-1--1--1,,1|(777,474)|
1,94,11,14,1,0,0,0,0,64,0,-1--1--1,,1|(1052,528)|
1,95,3,60,1,0,0,0,0,64,0,-1--1--1,,1|(1004,652)|
1,96,7,60,1,0,0,0,0,64,0,-1--1--1,,1|(1372,600)|
10,97,Anpassungszeit Entlastung,960,801,54,19,8,2,0,3,-1,0,0,0,128-128-128,0-0-0,|12||128-128-128
1,98,97,90,1,0,0,0,0,64,0,-1--1--1,,1|(1031,786)|
10,99,Anfangswert andere Verpflichtungen,1675,753,64,19,8,3,0,0,0,0,0,0
1,100,99,7,0,0,0,0,0,64,1,-1--1--1,,1|(1632,721)|
10,101,Exogener Inflow andere Verpflichtungen,1558,458,78,19,8,2,0,3,-1,0,0,0,128-128-128,0-0-0,|12||128-128-128
1,102,101,73,1,0,0,0,0,64,0,-1--1--1,,1|(1415,467)|
1,103,101,54,1,0,0,0,0,64,0,-1--1--1,,1|(1669,526)|
10,104,Exogener Inflow Erschöpfung,1129,23,57,19,8,2,0,3,-1,0,0,0,128-128-128,0-0-0,|12||128-128-128
1,105,104,76,1,0,0,0,0,64,0,-1--1--1,,1|(1095,111)|
1,106,104,75,1,0,0,0,0,64,0,-1--1--1,,1|(1051,45)|
10,107,Referenz andere Verpflichtungen,1681,310,74,23,3,131,0,0,0,0,0,0
1,108,101,107,1,0,0,0,0,128,0,-1--1--1,,1|(1555,391)|
1,109,99,107,0,0,0,0,0,64,1,-1--1--1,,1|(1677,540)|
1,110,37,43,1,0,0,0,0,128,0,-1--1--1,,1|(464,557)|
\\\---/// Sketch information - do not modify anything except names
V300  Do not put anything below this section - it will be ignored
*Aneignungsspirale
$192-192-192,0,Times New Roman|12||0-0-0|0-0-0|0-0-255|-1--1--1|-1--1--1|96,96,5,0
10,1,"Neuer P&B-Bedarf",157,215,42,19,8,3,0,0,0,0,0,0
10,2,"P&B-Leistung durch PBAP",328,562,107,261,3,131,0,0,0,0,0,0
10,3,"P&B Leistung durch Dritte",1509,584,105,281,3,131,0,0,0,0,0,0
12,4,48,653,575,10,8,0,3,0,0,-1,0,0,0
1,5,7,2,4,0,0,22,0,0,0,-1--1--1,,1|(472,570)|
1,6,7,4,100,0,0,22,0,0,0,-1--1--1,,1|(584,570)|
11,7,48,517,570,8,6,33,3,0,0,4,0,0,0
10,8,neuer Bedarf durch PBAP,567,570,61,19,40,3,0,0,-1,0,0,0
12,9,48,323,143,10,8,0,3,0,0,-1,0,0,0
1,10,12,9,4,0,0,22,0,0,0,-1--1--1,,1|(330,182)|
1,11,12,2,100,0,0,22,0,0,0,-1--1--1,,1|(330,263)|
11,12,48,330,219,8,6,33,131,0,0,4,0,0,0
10,13,Bedarfsreduktion an PBA,393,219,55,19,40,3,0,0,-1,0,0,0
12,14,48,1199,575,10,8,0,3,0,0,-1,0,0,0
1,15,17,3,4,0,0,22,0,0,0,-1--1--1,,1|(1329,574)|
1,16,17,14,100,0,0,22,0,0,0,-1--1--1,,1|(1223,574)|
11,17,48,1246,574,8,6,33,3,0,0,4,0,0,0
10,18,neuer Bedarf durch Dritte,1296,574,42,19,40,3,0,0,-1,0,0,0
12,19,48,1482,108,10,8,0,3,0,0,-1,0,0,0
1,20,22,19,4,0,0,22,0,0,0,-1--1--1,,1|(1483,158)|
1,21,22,3,100,0,0,22,0,0,0,-1--1--1,,1|(1483,258)|
11,22,48,1483,207,8,6,33,131,0,0,4,0,0,0
10,23,Bedarfsreduktion durch Dritte,1546,207,55,19,40,3,0,0,-1,0,0,0
1,24,26,3,4,0,0,22,0,0,0,-1--1--1,,1|(1158,751)|
1,25,26,2,100,0,0,22,0,0,0,-1--1--1,,1|(667,751)|
11,26,892,906,751,6,8,34,131,0,0,1,0,0,0
10,27,Entlastung durch Dritte,906,778,53,19,40,3,0,0,-1,0,0,0
10,28,"Bedarfsreduktion P&B",1565,269,60,19,8,2,0,3,0,0,0,0,128-128-128,0-0-0,|12||128-128-128
10,29,relative Aneignung durch die PBAP,910,413,58,19,8,3,0,0,0,0,0,0
1,30,28,23,1,0,0,0,0,64,0,-1--1--1,,1|(1563,263)|
1,31,29,8,1,0,0,0,0,64,0,-1--1--1,,1|(798,485)|
1,32,29,18,1,0,0,0,0,64,0,-1--1--1,,1|(1060,496)|
10,33,"Neuer P&B-Bedarf",1284,475,46,19,8,2,0,3,-1,0,0,0,128-128-128,0-0-0,|12||128-128-128
1,34,33,18,1,0,0,0,0,64,0,-1--1--1,,1|(1294,527)|
12,35,1,1302,207,23,23,4,3,0,0,-1,0,0,0
12,36,1,576,192,23,23,5,3,0,0,-1,0,0,0
10,37,"Bedarfsreduktion P&B",385,116,55,19,8,3,0,0,-1,0,0,0
1,38,37,13,1,0,0,0,0,64,0,-1--1--1,,1|(400,164)|
10,39,Entlastungsfähigkeit PBA,990,550,62,19,8,3,0,0,0,0,0,0
10,40,subjektiv wahrgenommene Überlastung,1161,710,73,18,8,130,0,3,-1,0,0,0,128-128-128,0-0-0,|12||128-128-128
10,41,subjektiv wahrgenommener Entlastungsbedarf,973,670,57,28,8,3,0,0,0,0,0,0
1,42,39,41,1,0,43,0,2,64,0,-1--1--1,|12||0-0-0,1|(994,623)|
1,43,41,27,1,0,43,0,2,64,0,-1--1--1,|12||0-0-0,1|(954,739)|
10,44,Anpassungszeit Entlastung,1149,823,49,19,8,3,0,0,0,0,0,0
1,45,44,27,1,0,0,0,0,64,0,-1--1--1,,1|(1075,782)|
1,46,2,49,1,0,0,0,0,64,0,-1--1--1,,1|(457,836)|
10,47,Max Flow Rate,857,900,51,12,8,131,0,0,0,0,0,0
1,48,47,49,1,0,0,0,0,64,0,-1--1--1,,1|(775,901)|
10,49,"Max Outflow PB-Leistung",724,875,43,19,8,3,0,0,0,0,0,0
1,50,49,27,1,0,0,0,0,64,0,-1--1--1,,1|(848,845)|
1,51,40,41,1,0,0,0,0,64,0,-1--1--1,,1|(1075,678)|
10,52,Antizipationsgrad,845,187,56,13,8,131,0,0,0,0,0,0
10,53,Sensitivität der Entlastungsfähigkeit,1119,585,62,19,8,3,0,0,0,0,0,0
1,54,53,39,1,0,0,0,0,64,0,-1--1--1,,1|(1076,566)|
1,55,29,39,1,0,45,0,2,64,0,-1--1--1,|12||0-0-0,1|(981,503)|
10,56,Grundwert Aneignung durch Dritte,995,198,70,19,8,3,0,0,-1,0,0,0
10,57,Wochen pro Jahr,900,276,55,11,8,3,0,0,0,0,0,0
10,58,Grad der Aneignung Dritte,1042,327,54,19,8,3,0,0,0,0,0,0
10,59,Grad der Aneignung PBAP,737,333,56,19,8,3,0,0,0,0,0,0
1,60,2,59,1,0,43,0,2,64,0,-1--1--1,|12||0-0-0,1|(556,386)|
1,61,52,59,1,0,0,0,0,64,0,-1--1--1,,1|(775,235)|
1,62,57,59,1,0,0,0,0,64,0,-1--1--1,,1|(806,293)|
1,63,56,58,1,0,0,0,0,64,0,-1--1--1,,1|(1037,244)|
1,64,3,58,1,0,0,0,0,64,0,-1--1--1,,1|(1270,391)|
1,65,59,29,1,0,43,0,2,64,0,-1--1--1,|12||0-0-0,1|(844,364)|
1,66,58,29,1,0,0,0,0,64,0,-1--1--1,,1|(967,363)|
10,67,Ablösungszeit,897,329,44,11,8,3,0,0,-1,0,0,0
1,68,67,59,1,0,0,0,0,64,0,-1--1--1,,1|(835,324)|
1,69,67,58,1,0,0,0,0,64,0,-1--1--1,,1|(965,316)|
1,70,57,58,1,0,0,0,0,64,0,-1--1--1,,1|(1009,272)|
10,71,Anteil der Leistung durch PBAP,884,131,60,19,8,3,0,0,0,0,0,0
1,72,2,71,1,0,0,0,0,64,0,-1--1--1,,1|(597,263)|
1,73,3,71,1,0,0,0,0,64,0,-1--1--1,,1|(1189,214)|
1,74,71,22,1,0,0,0,0,64,0,-1--1--1,,1|(1192,124)|
1,75,71,13,1,0,0,0,0,64,0,-1--1--1,,1|(599,143)|
10,76,Selbstmanagementfähigkeit,1283,651,101,12,8,131,0,0,-1,0,0,0
1,77,76,53,1,0,0,0,0,64,0,-1--1--1,,1|(1193,623)|
10,78,"Neuer P&B-Bedarf",532,507,46,19,8,2,0,3,-1,0,0,0,128-128-128,0-0-0,|12||128-128-128
1,79,78,8,1,0,0,0,0,64,0,-1--1--1,,1|(570,538)|
12,80,2,717,430,23,23,4,3,0,0,-1,0,0,0
12,81,2,557,635,23,23,4,3,0,0,-1,0,0,0
12,82,2,1152,435,23,23,5,3,0,0,-1,0,0,0
12,83,2,1112,662,23,23,5,3,0,0,-1,0,0,0
1,84,56,59,1,0,0,0,0,64,0,-1--1--1,,1|(937,200)|
10,85,Maximalwert subjektiv wahrgenommene Belastung,721,663,91,19,8,2,0,3,-1,0,0,0,128-128-128,0-0-0,|12||128-128-128
10,86,Minimalwert Entlastungsfähigkeit,868,574,62,19,8,3,0,0,0,0,0,0
1,87,85,86,1,0,0,0,0,64,0,-1--1--1,,1|(843,631)|
1,88,86,39,1,0,0,0,0,64,0,-1--1--1,,1|(884,532)|
10,89,Referenzwert zeitliche Beanspruchung,868,612,62,19,8,2,1,3,-1,0,0,0,128-128-128,0-0-0,|12||128-128-128
1,90,2,27,1,0,0,0,0,64,0,-1--1--1,,1|(451,761)|
10,91,zeitliche Beanspruchung unter Referenzwert Leistungsfähigkeit,1051,870,84,19,8,2,0,3,-1,0,0,0,128-128-128,0-0-0,|12||128-128-128
1,92,91,27,1,0,0,0,0,64,0,-1--1--1,,1|(991,805)|
12,93,1,677,798,23,23,4,3,0,0,-1,0,0,0
10,94,Anfangswert Leistung durch PBA,101,655,69,19,8,3,0,0,0,0,0,0
10,95,Anfangswert Leistung durch Dritte,1758,701,69,19,8,3,0,0,0,0,0,0
1,96,94,2,0,0,0,0,0,64,1,-1--1--1,,1|(177,623)|
1,97,95,3,0,0,0,0,0,64,1,-1--1--1,,1|(1672,660)|
10,98,Inflow Bedarf,75,168,53,11,8,2,0,3,-1,0,0,0,128-128-128,0-0-0,|12||128-128-128
1,99,98,1,1,0,0,0,0,64,0,-1--1--1,,1|(92,208)|
1,100,98,37,1,0,0,0,0,64,0,-1--1--1,,1|(288,94)|
\\\---/// Sketch information - do not modify anything except names
V300  Do not put anything below this section - it will be ignored
*Control + Output
$192-192-192,0,Times New Roman|12||0-0-0|0-0-0|0-0-255|-1--1--1|-1--1--1|96,96,5,0
12,1,658390,141,241,80,20,3,124,0,0,0,0,0,0
Responsivität der Leistungsfähigkeit,0.3,2,0.1
12,2,396496,1366,586,235,153,3,188,0,0,1,0,0,0
BELASTUNG_REF
12,3,396140,802,589,216,148,3,188,0,0,1,0,0,0
LEISTUNG_ref
12,4,396504,108,322,80,20,3,124,0,0,0,0,0,0
Anpassungszeit Entlastung,0.01,1,0.01
12,5,330986,1153,220,80,20,3,124,0,0,0,0,0,0
Antizipationsgrad,-5,5,0.5
12,6,396298,1361,224,80,20,3,124,0,0,0,0,0,0
Belastbarkeit,0.1,10,0.1
12,7,330922,1375,306,80,20,3,124,0,0,0,0,0,0
Selbstmanagementfähigkeit,0.1,10,0.1
12,8,527228,1147,301,80,20,3,124,0,0,0,0,0,0
Priorität anderer Verpflichtungen,-4,6,0.5
12,9,396500,274,587,242,136,3,188,0,0,1,0,0,0
Verpflichtung_ref
12,10,0,324,133,107,28,8,7,0,0,-1,0,0,0
Parameteränderungen gegenüber der Grundparametrisierung für die idealtypischen Verläufe: 
12,11,0,562,151,87,61,8,135,0,0,-1,0,0,0
distanziert: Antizipationsgrad = -5; Priorität anderer Verpflichtungen = 1;  Belastbarkeit = 4.
12,12,0,759,160,79,73,8,135,0,0,-1,0,0,0
kritisch: Antizipationsgrad = 2; Priorität anderer Verpflichtungen = 1; Belastbarkeit = 1;  Selbstmanagement- fähigkeit = 0.45.
12,13,0,553,305,95,72,8,135,0,0,-1,0,0,0
selbstregulierend: Antizipationsgrad = 3; Priorität anderer Verpflichtungen = 1; Belastbarkeit = 1.
12,14,0,761,330,75,72,8,135,0,0,-1,0,0,0
resilient: Antizipationsgrad = 2; Priorität anderer Verpflichtungen = 1;  Belastbarkeit = 6;  Selbstmanagement- fähigkeit = 0.45.
\\\---/// Sketch information - do not modify anything except names
V300  Do not put anything below this section - it will be ignored
*exogene Einflüsse
$192-192-192,0,Times New Roman|12||0-0-0|0-0-0|0-0-255|-1--1--1|-1--1--1|96,96,5,0
10,1,Inflow Bedarf,372,347,44,11,8,3,0,0,0,0,0,0
10,2,Pulse Input Inflow Bedarf 2,231,266,58,19,8,3,0,0,0,0,0,0
10,3,Pulse Time Inflow Bedarf 2,452,252,57,19,8,3,0,0,0,0,0,0
10,4,Pulse Duration Inflow Bedarf 2,576,323,50,19,8,3,0,0,0,0,0,0
10,5,Pulse Time Inflow Bedarf 1,302,436,57,19,8,3,0,0,0,0,0,0
10,6,Pulse Input Inflow Bedarf 1,449,449,58,19,8,3,0,0,0,0,0,0
10,7,Pulse Duration Inflow Bedarf 1,565,408,50,19,8,3,0,0,0,0,0,0
1,8,2,1,1,0,0,0,0,64,0,-1--1--1,,1|(303,279)|
1,9,3,1,1,0,0,0,0,64,0,-1--1--1,,1|(408,294)|
1,10,4,1,1,0,0,0,0,64,0,-1--1--1,,1|(489,349)|
1,11,5,1,1,0,0,0,0,64,0,-1--1--1,,1|(367,400)|
1,12,6,1,1,0,0,0,0,64,0,-1--1--1,,1|(414,405)|
1,13,7,1,1,0,0,0,0,64,0,-1--1--1,,1|(470,403)|
10,14,Exogener Inflow andere Verpflichtungen,1157,251,73,19,8,3,0,0,0,0,0,0
10,15,Pulse Input Inflow andere Verpflichtungen,1046,339,73,19,8,3,0,0,0,0,0,0
10,16,Pulse Time andere Verpflichtungen,967,195,59,19,8,3,0,0,0,0,0,0
10,17,Pulse Duration andere Verpflichtungen,1297,148,70,19,8,3,0,0,0,0,0,0
1,18,15,14,1,0,0,0,0,64,0,-1--1--1,,1|(1083,296)|
1,19,16,14,1,0,0,0,0,64,0,-1--1--1,,1|(1109,177)|
1,20,17,14,1,0,0,0,0,64,0,-1--1--1,,1|(1245,200)|
10,21,Exogener Inflow Erschöpfung,1161,511,53,19,8,3,0,0,0,0,0,0
10,22,Pulse Time Erschöpfung,954,538,40,19,8,3,0,0,0,0,0,0
10,23,Pulse Input Erschöpfung,1159,599,40,19,8,3,0,0,0,0,0,0
10,24,Pulse Duration Erschöpfung,1296,450,47,19,8,3,0,0,0,0,0,0
1,25,22,21,1,0,0,0,0,64,0,-1--1--1,,1|(1048,521)|
1,26,23,21,1,0,0,0,0,64,0,-1--1--1,,1|(1154,567)|
1,27,24,21,1,0,0,0,0,64,0,-1--1--1,,1|(1243,498)|
10,28,"P&B Bedarf",60,403,40,20,3,3,0,0,0,0,0,0
1,29,1,28,1,0,0,0,0,128,0,-1--1--1,,1|(235,360)|
///---\\\
:GRAPH BELASTUNG_REF
:TITLE Subjektiv wahrgenommene Belastung
:SCALE
:VAR subjektiv wahrgenommene Belastung
:Y-MIN 0.9
:Y-MAX 3
:VAR subjektiv wahrgenommene Belastung
:Y-MIN 0.9
:Y-MAX 3
:DATASET *2

:GRAPH LEISTUNG_ref
:TITLE Leistung
:SCALE
:VAR "P&B-Leistung durch PBAP"
:VAR "P&B Bedarf"
:VAR "P&B-Leistung durch PBAP"
:DATASET *2

:GRAPH Verpflichtung_ref
:TITLE andere Verpflichtungen
:SCALE
:VAR andere Verpflichtungen
:SCALE
:VAR Referenz andere Verpflichtungen
:SCALE
:VAR andere Verpflichtungen
:DATASET *2
:L<%^E!@
9:Base
22:$,Dollar,Dollars,$s
22:Hour,Hours
22:Month,Months
22:Person,People,Persons
22:Unit,Units
22:Week,Weeks
22:Year,Years
22:Day,Days
23:0
15:0,0,0,0,0,0
19:5,0
27:2,
34:0,
4:Time
5:Priorität anderer Verpflichtungen
35:Date
36:YYYY-MM-DD
37:2000
38:1
39:1
40:0
41:0
42:0
24:2005
25:2015
26:2015
57:1
54:0
55:0
59:1
56:0
58:0
44:65001
46:1
45:1
49:1
50:0
51:
52:
53:
43:distanziert
47:distanziert
48:List_Publication.lst
